# Supplementary material for: Facile preparation of TiOXfilm as an interface material for efficient inverted polymer solar cells
Source: Royal Society of Chemistry journal article supplement (doi:10.1039/c3ta13275g), 2013-10-26
Supplement: c3ta13275g.pdf [file c3ta13275g.pdf]

Supporting Information

## Facile preparation of $\text{TiO}_x$ film as interface material for efficient inverted polymer solar cells

Xichang Bao<sup>a†</sup>, Liang Sun<sup>a,b†</sup>, Wenfei Shen<sup>a,c</sup>, Chunpeng Yang<sup>a</sup>, Weichao Chen<sup>a</sup>, Renqiang Yang<sup>a\*</sup>

<sup>a</sup> CAS Key Laboratory of Bio-based Materials, Qingdao Institute of Bioenergy and Bioprocess Technology, Chinese Academy of Sciences, Qingdao 266101, China

<sup>b</sup> University of Chinese Academy of Sciences, Beijing 100049, China

<sup>c</sup> Institute of Hybrid Materials, Laboratory of New Fiber Materials and Modern Textile – The Growing Base for State Key Laboratory, Qingdao University, Qingdao 266071, China

<sup>†</sup> These authors contributed equally to this work.

E-mail: [yangrq@qibebt.ac.cn](mailto:yangrq@qibebt.ac.cn) (R. Yang)

### 1. Low bandgap polymer and device fabrication

Scheme S1 shows the structure of low bandgap polymer **P1**, which was obtained from Shenzhen (China) Derthon Optoelectronic Materials Science & Technology Co., LTD. The molecular weight (Mw) is 87600 and the polydispersity index (PDI) is 3.65.

Inverted polymer solar cell was fabricated with polymer **P1** by spin-coating of a 1:2 polymer:PC<sub>71</sub>BM mixture in a 4:1 chloroform/*o*-dichlorobenzene solution onto an ITO: $\alpha$ -TiO<sub>x</sub> substrate, followed by evaporation of MoO<sub>3</sub> (5 nm)/Ag (100 nm) as an anode. The concentration of **P1** and the thickness of active layer are the same with Ref. 1.

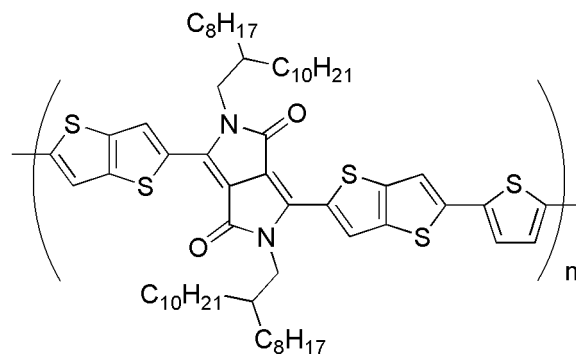

**Scheme S1.** The molecular structure of P1.

## 2. Photovoltaic performance of the PSC

Figure S1 shows the photovoltaic performance of the inverted PSC based on **P1**:PC<sub>71</sub>BM. The PCE 4.99% is obtained, with an improved short circuit current density ( $J_{SC}$ ) of 16.09 mA/cm<sup>2</sup>, an open circuit voltage ( $V_{OC}$ ) of 0.547 V and a fill factor (FF) of 56.8%. One can observe that its  $J_{SC}$  was improved compared to the data of Ref. 1 (15.0 mA/cm<sup>2</sup>). The improved  $J_{SC}$  is consistent with the results obtained from the devices based on P3HT and fullerenes system.

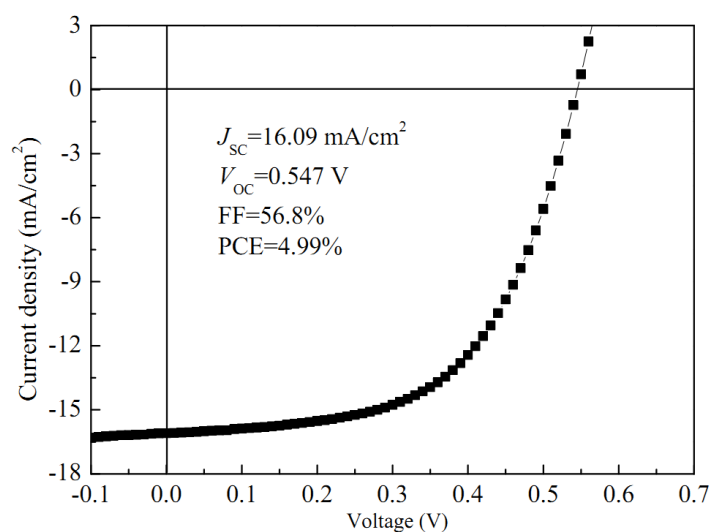

**Figure S1.** Photovoltaic performance of inverted polymer solar cell based on **P1**:PC<sub>71</sub>BM system.

## Reference

1. H. Bronstein, Z. Chen, R. S. Ashraf, W. Zhang, J. Du, J. R. Durrant, P. S. Tuladhar, K. Song, S. E. Watkins, Y. Geerts, M. M. Wienk, R. A. J. Janssen, T. Anthopoulos, H. Sirringhaus, M. Heaney, I. McCulloch, *J. Am. Chem. Soc.* 2011, **133**, 3272–3275.
